# Supplementary material for: Perceived ability to comply with national COVID-19 mitigation strategies and their impact on household finances, food security, and mental well-being of medical and pharmacy students in Liberia
Source: PubMed Central journal article supplement (PMC8270202; doi:10.1371/journal.pone.0254446), 2021-07-09
Supplement: pone.0254446.s008.pdf [file pone.0254446.s008.pdf]

# Invitation and Consent

You are being asked to participate in a survey to explore your knowledge, attitudes, and perceptions about the COVID-19 pandemic and its impact on your household's ability to comply with Liberia's current control measures. Please note, we want you to respond about the household where you have decided to spend most of your time during the COVID-19 Stay-At-Home order.

Please complete the survey below.

Thank you!

---

---

First Name

---

---

Last name

---

---

Signature

---

# Demographic Information

You are being asked to participate in a survey for the purpose of investigating your knowledge, attitudes, and perceptions about the COVID-19 pandemic and its impact on your household's ability to comply with Liberia's current control measures.

Please complete the survey below.

Thank you!

---

1. Gender

- Male  
 Female

---

2. What is your age in years?

\_\_\_\_\_

---

3. Date of Birth

[PLEASE CONFIRM YOU FILLED OUT MONTH, DAY AND YEAR  
CORRECTLY BEFORE ADVANCING]

\_\_\_\_\_

---

4. Marital Status

- Single never married  
 Married  
 Cohabiting  
 Divorced  
 Widowed

---

5. Occupation

- Employed for wages  
 Self Employed  
 Domestic work in someone else's home  
 Homemaker  
 Farming  
 Unemployed  
 Student  
 Retired  
 Other

---

6. County of residence during the COVID-19  
Stay-at-home order

- Bong  
 Bomi  
 Grand Bassa  
 Grand Gedeh  
 Grand Cape Mount  
 Ghapolu  
 Grand Kru  
 Lofa  
 Maryland  
 Montserrado  
 Margibi  
 Nimba  
 Rivercess  
 River Gee  
 Sinoe

---

7. What is the highest educational level you  
completed?

- Highschool graduate  
 College 1 year to 3 years (some college or  
technical school)  
 College 4 years or more (Completed college)

# Household Information

Please complete the survey below.

Thank you!

8. Number of people [COUNTING YOURSELF] living in the household where you are spending the majority of your time during the COVID-19 Stay-at-home order

\_\_\_\_\_

9. Including yourself, how many members of your household are > 60 years old?

\_\_\_\_\_

10. Number of children < age 5 years old living in your household?

\_\_\_\_\_

11. Which of these property types best describes the household where you currently spend the majority of your time during the COVID-19 Stay-at-home order?

- A multi-unit property. This includes a condominium, co-op, or building with two more units.
- A single-unit property. This includes a detached home or townhouse.
- A dormitory, group home, assisted living, or nursing home
- Other
- Don't know / Not sure

12. Has a doctor, nurse, or other health professional ever told you that you had any of the following?

[PLEASE SELECT ALL THAT APPLY]

- A heart attack, also called a myocardial infarction
- Angina or coronary heart disease
- High blood pressure
- Type II diabetes
- Cancer
- Asthma
- Chronic obstructive pulmonary disease (COPD), emphysema, or chronic bronchitis
- Kidney disease
- HIV
- Tuberculosis
- Ebola survivor
- Lassa Fever
- Immunodeficiency
- None of the above

13. Not counting yourself, does anyone in your household have any of the following?

[PLEASE SELECT ALL THAT APPLY]

- A heart attack, also called a myocardial infarction
- Angina or coronary heart disease
- High blood pressure
- Type II diabetes
- Cancer
- Asthma
- Chronic obstructive pulmonary disease (COPD), emphysema, or chronic bronchitis
- Kidney disease
- HIV
- Tuberculosis
- Has previously had Ebola and survived
- Has previously had Lassa Fever
- Immunodeficiency
- No

14. Are you currently pregnant?

- Yes
- No
- Not applicable

15. Not counting yourself, is anyone in your household pregnant?  Yes  
 No

16. Does your household have electricity?  Yes  
 No

17. Does your household have a radio/television?  Yes  
 No

18. Does anyone in your household have a cell phone?  Yes  
 No

19. Do you own a face mask?  Yes  
 No

20. Everyone living in my household has their own face mask?  True  
 False

21. What is the main source for drinking water for members in your household?

[PICK JUST ONE ANSWER]

- TUBE WELL OR BOREHOLE
- DUG WELL-PROTECTED WELL
- DUG WELL-UNPROTECTED WELL
- WATER FROM SPRING-PROTECTED SPRING
- WATER FROM SPRING-UNPROTECTED SPRING
- RAINWATER
- TANKER TRUCK
- CART WITH SMALL TANK
- SURFACE WATER (RIVER/POND/STREAM/IRRIGATION CHANNEL)
- BOTTLED WATER
- PIPED WATER- PIPED INTO DWELLING
- PIPED WATER- PIPED TO YARD/PLOT
- PIPED WATER- PIPED TO NEIGHBOR
- PIPED WATER- PUBLIC TAP/STANDPIPE
- Other

22. What is the length of time IN MINUTES that it takes to reach this source of drinking water?

\_\_\_\_\_ (provide time in minutes)

[IF YOUR WATER SOURCES IS PIPED INTO YOUR HOUSE OR YARD PLEASE ENTER "0"]

23. Does your household have a place for handwashing?  Yes  
 No

24. Currently, what kind of toilet facility do you and members of your household use?

[PICK JUST ONE ANSWER]

- NO FACILITY/FIELD,
- IN-DOOR TOILET
- TRADITIONAL PIT TOILET
- VENTILATED IMPROVED PIT LATRINE
- NEIGHBOR'S TRADITIONAL PIT TOILET
- NEIGHBOR'S IMPROVED PIT LATRINE
- OTHER

# Precautions and Impact

Please complete the survey below.

Thank you!

25. Are you currently able to follow the Stay-at Home order?

- Yes  
 No

26. In the past TWO WEEKS, what best describes how frequently you have left your home for work?

- Once a day  
 Three to four times per week  
 One to two times per week  
 I have not left my house in the past two weeks  
 Not applicable, not employed

27. In the past TWO WEEKS, what best describes how frequently you or a member of your household has left your home to purchase goods for the household?

- Once a day  
 Three to four times per week  
 One to two times per week  
 I have not left my house in the past two weeks  
 Not applicable

28. In the past TWO WEEKS, how often did you wear a face mask when you left the home for work or to purchase goods?

- Never  
 Sometimes  
 Often  
 Every time

29. In the past TWO WEEKS, how often did you feel you could practice good social distancing when you left your home?

- Never  
 Sometimes  
 Often  
 Every time

[social distancing = staying six feet away from other persons]

30. In the past MONTH, have you experienced a personal loss of income as a result of COVID-19?

- Yes  
 No  
 Not Applicable

31. If yes experienced a personal loss of income: Which of the following contributed to your personal loss of income?

[CHECK ALL THAT APPLY]

- I was fired/laid off  
 I was given time off without pay (not fired, but not working)  
 I was given time off with reduced pay (employer provided benefits)  
 My hours were reduced  
 I could not work and care for a child in the household  
 I felt I was at high risk for COVID-19 and did not want to leave the home  
 My place of employment was temporarily closed  
 Other

32. For how long do you think your household can follow the Stay-at Home orders before you are financially impacted?

- We are already experiencing financial difficulty  
 One-two more weeks  
 Two-four more weeks  
 One-two more months  
 Three-four more months  
 For as long as Liberia feels it is necessary  
 Don't know

---

33. How worried are you about your household's financial situation as a result of COVID-19?

- Not worried
- Somewhat worried
- Very worried

---

34. How worried are you about the health of your household members due to COVID-19:

- Not worried
- Somewhat worried
- Very worried

---

35. Which statement best reflects your household's food situation over THE LAST 7 DAYS

- I have had no difficulties eating enough food (normal pattern)
- I ate less preferred foods
- I skipped meals or ate less than usual
- I have gone at least one full day without eating
- I increased my food intake

---

36. Does your household have enough food stocks?

[Please pick the best answer that describes your household]

- Yes enough stock for less than one week
- Yes enough stock for one week
- Yes enough stock for 1-2 weeks
- Yes enough stock for 1 month
- Yes enough stock for more than 1 month
- No

# Knowledge of COVID-19

Please complete the survey below.

Thank you!

---

|                                                                                                      |                                                                                                                                                                                                                                                                                                                                                                                                                                                                                                |
|------------------------------------------------------------------------------------------------------|------------------------------------------------------------------------------------------------------------------------------------------------------------------------------------------------------------------------------------------------------------------------------------------------------------------------------------------------------------------------------------------------------------------------------------------------------------------------------------------------|
| 37. COVID-19 is a virus that is thought to have been transmitted to humans from bats?                | <input type="radio"/> True<br><input type="radio"/> False                                                                                                                                                                                                                                                                                                                                                                                                                                      |
| 38. COVID-19 is transmitted through air                                                              | <input type="radio"/> True<br><input type="radio"/> False                                                                                                                                                                                                                                                                                                                                                                                                                                      |
| 39. COVID-19 is transmitted through physical contact                                                 | <input type="radio"/> True<br><input type="radio"/> False                                                                                                                                                                                                                                                                                                                                                                                                                                      |
| 40. COVID-19 is transmitted by touching surfaces                                                     | <input type="radio"/> True<br><input type="radio"/> False                                                                                                                                                                                                                                                                                                                                                                                                                                      |
| 41. COVID-19 is transmitted through exposure to someones stool/feces                                 | <input type="radio"/> True<br><input type="radio"/> False                                                                                                                                                                                                                                                                                                                                                                                                                                      |
| 42. Which of the following are symptoms of COVID-19 infection<br>[CHECK ALL THAT APPLY]              | <input type="checkbox"/> Cough<br><input type="checkbox"/> Shortness of breath<br><input type="checkbox"/> Fever<br><input type="checkbox"/> Headache<br><input type="checkbox"/> Sore throat<br><input type="checkbox"/> Loss of taste or smell<br><input type="checkbox"/> discoloration, lesions on the toes<br><input type="checkbox"/> Vomiting<br><input type="checkbox"/> Diarrhea<br><input type="checkbox"/> Unexplained bleeding or bruising<br><input type="checkbox"/> Weight loss |
| 43. How long can you be infected with COVID-19 and not have symptoms                                 | <input type="radio"/> 0-2 days<br><input type="radio"/> 3-14 days<br><input type="radio"/> > 2 weeks<br><input type="radio"/> > one month<br><input type="radio"/> Don't know                                                                                                                                                                                                                                                                                                                  |
| 44. You can transmit the virus to others if you have no symptoms                                     | <input type="radio"/> True<br><input type="radio"/> False                                                                                                                                                                                                                                                                                                                                                                                                                                      |
| 45. Supportive care is the current treatment for COVID-19 in Liberia                                 | <input type="radio"/> True<br><input type="radio"/> False                                                                                                                                                                                                                                                                                                                                                                                                                                      |
| 46. Covering your nose and mouth while coughing, can help in the prevention of COVID-19 transmission | <input type="radio"/> True<br><input type="radio"/> False                                                                                                                                                                                                                                                                                                                                                                                                                                      |
| 47. Washing your hands with soap and water can help in the prevention of COVID-19 transmission       | <input type="radio"/> True<br><input type="radio"/> False                                                                                                                                                                                                                                                                                                                                                                                                                                      |
| 48. Wearing a mask protects you from being infected with COVID-19                                    | <input type="radio"/> True<br><input type="radio"/> False                                                                                                                                                                                                                                                                                                                                                                                                                                      |
| 49. Wearing a mask protects you from giving COVID-19 to others                                       | <input type="radio"/> True<br><input type="radio"/> False                                                                                                                                                                                                                                                                                                                                                                                                                                      |

# Attitudes and Perceptions about COVID-19

Please complete the survey below.

Thank you!

---

50. Most people who are infected with COVID-19 will die

- True  
 False

---

51. Most people who are infected with COVID-19 will recover

- True  
 False

---

52. Even though children seem to have less severe symptoms when infected with COVID-19, they can be an important source of transmission to others

- True  
 False

---

53. Since the COVID-19 outbreak began in February and March 2020, do you feel that your ability to receive medical care for other significant health issues has been impacted?

- Yes  
 No  
 Don't know / Not sure

---

54. Do you know whom to contact if you or family member gets exposed to someone who is infected with COVID-19?

- Yes  
 No

---

55. If you think someone in your household has been infected with COVID-19 where will you first seek treatment?

[CHOOSE ONE BEST ANSWER]

- Won't seek treatment  
 Hospital  
 Local Pharmacy  
 Traditional Healer  
 Family member  
 Church  
 Don't Know

---

56. If you or a family member have to go to the health facility for COVID-19 how confident are you that the health facility will be able to help you or your family member?

- Not confident at all  
 Somewhat confident  
 Very confident

---

57. Do you feel that Liberia's experience with dealing with Ebola has made Liberia prepared to appropriately respond to COVID-19?

- No, not prepared  
 Somewhat prepared  
 Very prepared



# Questions about your state of mind

Please complete the survey below.

Thank you!

---

58. In the last TWO WEEKS, how many days did you have little interest or little happiness in doing things?

- NO DAYS
- LESS THAN 1 WEEK
- 1 WEEK OR MORE
- ALMOST ALL DAYS
- DON'T KNOW
- PREFER NOT TO ANSWER

---

59. In the last TWO WEEKS, how many days did you feel down, depressed or without motivation?

- NO DAYS
- LESS THAN 1 WEEK
- 1 WEEK OR MORE
- ALMOST ALL DAYS
- DON'T KNOW
- PREFER NOT TO ANSWER

---

60. In the last TWO WEEKS, how many days did you have difficulty sleeping, staying asleep, or sleeping more than is customary?

- NO DAYS
- LESS THAN 1 WEEK
- 1 WEEK OR MORE
- ALMOST ALL DAYS
- DON'T KNOW
- PREFER NOT TO ANSWER

---

61. In the last TWO WEEKS, how many days did you feel tired or with little energy?

- NO DAYS
- LESS THAN 1 WEEK
- 1 WEEK OR MORE
- ALMOST ALL DAYS
- DON'T KNOW
- PREFER NOT TO ANSWER

---

62. In the last TWO WEEKS, how many days did you have lack of appetite or ate less?

- NO DAYS
- LESS THAN 1 WEEK
- 1 WEEK OR MORE
- ALMOST ALL DAYS
- DON'T KNOW
- PREFER NOT TO ANSWER

---

63. In the last TWO WEEKS, how many days did you feel bad about yourself, thought you were a failure, or that you let down your family or yourself?

- NO DAYS
- LESS THAN 1 WEEK
- 1 WEEK OR MORE
- ALMOST ALL DAYS
- DON'T KNOW
- PREFER NOT TO ANSWER

---

64. In the last TWO WEEKS, how many days did you have difficulty concentrating on things (such as reading a newspaper, watching, or listening to the radio)?

- NO DAYS
- LESS THAN 1 WEEK
- 1 WEEK OR MORE
- ALMOST ALL DAYS
- DON'T KNOW
- PREFER NOT TO ANSWER

---

65. In the last TWO WEEKS, how many days did you feel slow in your movements or in speaking; or the contrary, in which you felt agitated and you stayed walking from one side to another, more than is customary?

- NO DAYS
- LESS THAN 1 WEEK
- 1 WEEK OR MORE
- ALMOST ALL DAYS
- DON'T KNOW
- PREFER NOT TO ANSWER

---

66. How much do you feel COVID-19 has contributed to the way you feel currently?

- I felt this way before COVID-19 arrived
- COVID-19 has worsened the way I feel
- COVID-19 has improved the way I feel
- Unsure/Don't know
